# Supplementary material for: Activation of the basal cell carcinoma pathway in a patient with CNS HGNET-BCOR diagnosis: consequences for personalized targeted therapy
Source: PubMed Central journal article supplement (PMC5347776; doi:10.18632/oncotarget.13092), 2016-11-04
Supplement: oncotarget-07-83378-s001.pdf [file oncotarget-07-83378-s001.pdf]

## **Activation of the basal cell carcinoma pathway in a patient with CNS HGNET-BCOR diagnosis: consequences for personalized targeted therapy**

### **SUPPLEMENTARY TABLES AND FIGURES**

**Supplementary Table S1: Transcripts of the BCC pathway upregulated in the primary tumor and a metastasis**

See Supplementary File 1

**Supplementary Table S2: Transcripts of the Glioblastoma Multiforme Pathway upregulated in sample 127.**  
See supplementary Table 1 for legend

| Symbol | Entrez Gene Name                                     | Exp Fold Change | Expected | Location            | Type(s)                    |
|--------|------------------------------------------------------|-----------------|----------|---------------------|----------------------------|
| CCND1  | cyclin D1                                            | 14.102          | Up       | Nucleus             | transcription regulator    |
| CDK6   | cyclin-dependent kinase 6                            | 13.666          |          | Nucleus             | kinase                     |
| CDKN1A | cyclin-dependent kinase inhibitor 1A (p21. Cip1)     | 10.620          | Down     | Nucleus             | kinase                     |
| EGFR   | epidermal growth factor receptor                     | 16.588          | Up       | Plasma Membrane     | kinase                     |
| FZD7   | frizzled class receptor 7                            | 11.610          | Up       | Plasma Membrane     | G-protein coupled receptor |
| FZD10  | frizzled class receptor 10                           | 36.247          | Up       | Plasma Membrane     | G-protein coupled receptor |
| IGF2   | insulin like growth factor 2                         | 196.468         | Up       | Extracellular Space | growth factor              |
| LEF1   | lymphoid enhancer binding factor 1                   | 28.303          | Up       | Nucleus             | transcription regulator    |
| PDGFRA | platelet derived growth factor receptor alpha        | 15.102          | Up       | Plasma Membrane     | kinase                     |
| PLCE1  | phospholipase C epsilon 1                            | 10.518          | Up       | Cytoplasm           | enzyme                     |
| PLCG2  | phospholipase C gamma 2                              | 24.915          | Up       | Cytoplasm           | enzyme                     |
| SMO    | smoothened. frizzled class receptor                  | 13.632          | Up       | Plasma Membrane     | G-protein coupled receptor |
| WNT11  | wingless-type MMTV integration site family member 11 | 94.040          | Up       | Extracellular Space | other                      |
| WNT5A  | wingless-type MMTV integration site family member 5A | 16.129          | Up       | Extracellular Space | cytokine                   |

**Supplementary Table S3: Expression of IGF2 and IGF1R in the primary tumor, a metastasis and normal brain**

| Sample | Symbol | Entrez Gene Name                      | TPM     |
|--------|--------|---------------------------------------|---------|
| 127    | IGF2   | insulin like growth factor 2          | 1139.32 |
| 127    | IGF1R  | insulin-like growth factor 1 receptor | 72.77   |
| 123    | IGF2   | insulin like growth factor 2          | 9944.16 |
| 123    | IGF1R  | insulin-like growth factor 1 receptor | 44.8    |
| 166    | IGF2   | insulin like growth factor 2          | 1100.83 |
| 166    | IGF1R  | insulin-like growth factor 1 receptor | 35.52   |
| 111    | IGF2   | insulin like growth factor 2          | 5.79    |
| 111    | IGF1R  | insulin-like growth factor 1 receptor | 11.11   |

123 and 127 are two regions of the primary tumor. 166 is a metastasis. 111 is normal brain. The TPM values of the indicated transcripts are shown.

**Supplementary Table S4: Transcripts of the PCP Pathway upregulated in sample 127. See supplementary Table 1 for legend**

| Symbol | Entrez Gene Name                                        | Exp Fold Change | Expected | Location            | Type(s)                          |
|--------|---------------------------------------------------------|-----------------|----------|---------------------|----------------------------------|
| CELSR1 | cadherin EGF LAG seven-pass<br>G-type receptor 1        | 63.767          |          | Plasma Membrane     | G-protein<br>coupled<br>receptor |
| FZD7   | frizzled class receptor 7                               | 11.610          | Up       | Plasma Membrane     | G-protein<br>coupled<br>receptor |
| FZD10  | frizzled class receptor 10                              | 36.247          | Up       | Plasma Membrane     | G-protein<br>coupled<br>receptor |
| MAPK9  | mitogen-activated protein<br>kinase 9                   | 14.183          | Up       | Cytoplasm           | kinase                           |
| ROR2   | receptor tyrosine kinase-like<br>orphan receptor 2      | 15.585          | Up       | Plasma Membrane     | kinase                           |
| SDC1   | syndecan 1                                              | 12.272          |          | Plasma Membrane     | enzyme                           |
| SMO    | smoothened. frizzled class<br>receptor                  | 13.632          | Up       | Plasma Membrane     | G-protein<br>coupled<br>receptor |
| WNT11  | wingless-type MMTV integration<br>site family member 11 | 94.040          | Up       | Extracellular Space | other                            |
| WNT5A  | wingless-type MMTV integration<br>site family member 5A | 16.129          | Up       | Extracellular Space | cytokine                         |

**Supplementary Table S5: Transcripts of the Polo like kinases Pathway upregulated in the metastasis (sample 166).  
See supplementary Table 1 for legend**

| Symbol  | Entrez Gene Name                                     | Exp Fold Change | Expected | Location  | Type(s)                    |
|---------|------------------------------------------------------|-----------------|----------|-----------|----------------------------|
| CCNB1   | cyclin B1                                            | 10.047          | Up       | Cytoplasm | kinase                     |
| CCNB2   | cyclin B2                                            | 88.049          | Up       | Cytoplasm | other                      |
| CDC20   | cell division cycle 20                               | 12.053          | Up       | Nucleus   | other                      |
| CDC25A  | cell division cycle 25A                              | 19.930          | Up       | Nucleus   | phosphatase                |
| CDK1    | cyclin-dependent kinase 1                            | 160.964         | Up       | Nucleus   | kinase                     |
| CHEK2   | checkpoint kinase 2                                  | 12.647          |          | Nucleus   | kinase                     |
| ESPL1   | extra spindle pole bodies like 1.<br>separase        | 12.644          | Down     | Nucleus   | peptidase                  |
| FBXO5   | F-box protein 5                                      | 11.876          | Down     | Nucleus   | enzyme                     |
| KIF11   | kinesin family member 11                             | 41.834          | Up       | Nucleus   | other                      |
| KIF23   | kinesin family member 23                             | 41.785          | Up       | Cytoplasm | other                      |
| PLK1    | polo-like kinase 1                                   | 20.185          | Up       | Nucleus   | kinase                     |
| PLK4    | polo-like kinase 4                                   | 23.206          | Up       | Cytoplasm | kinase                     |
| PPP2R3B | protein phosphatase 2 regulatory<br>subunit B". beta | 18.921          |          | Nucleus   | phosphatase                |
| PRC1    | protein regulator of cytokinesis 1                   | 13.463          |          | Nucleus   | other                      |
| PTTG1   | pituitary tumor-transforming 1                       | 15.885          | Down     | Nucleus   | transcription<br>regulator |
| WEE1    | WEE1 G2 checkpoint kinase                            | 93.430          | Down     | Nucleus   | kinase                     |

**Supplementary Table S6: Transcripts of the Polo like kinases Pathway upregulated in sample 127.**  
See supplementary Table 1 for legend

| Symbol  | Entrez Gene Name                                     | Exp Fold Change | Expected | Location  | Type(s)                    |
|---------|------------------------------------------------------|-----------------|----------|-----------|----------------------------|
| CCNB1   | cyclin B1                                            | 1.324           | Up       | Cytoplasm | kinase                     |
| CCNB2   | cyclin B2                                            | 9.24            | Up       | Cytoplasm | other                      |
| CDC20   | cell division cycle 20                               | 1.053           | Up       | Nucleus   | other                      |
| CDC25A  | cell division cycle 25A                              | 1.258           | Up       | Nucleus   | phosphatase                |
| CDK1    | cyclin-dependent kinase 1                            | 20.525          | Up       | Nucleus   | kinase                     |
| CHEK2   | checkpoint kinase 2                                  | 4.239           |          | Nucleus   | kinase                     |
| ESPL1   | extra spindle pole bodies like 1.<br>separase        | 1.826           | Down     | Nucleus   | peptidase                  |
| FBXO5   | F-box protein 5                                      | 2.212           | Down     | Nucleus   | enzyme                     |
| KIF11   | kinesin family member 11                             | 7.833           | Up       | Nucleus   | other                      |
| KIF23   | kinesin family member 23                             | 4.541           | Up       | Cytoplasm | other                      |
| PLK1    | polo-like kinase 1                                   | 5.515           | Up       | Nucleus   | kinase                     |
| PLK4    | polo-like kinase 4                                   | 3.235           | Up       | Cytoplasm | kinase                     |
| PPP2R3B | protein phosphatase 2 regulatory<br>subunit B". beta | 1,112           |          | Nucleus   | phosphatase                |
| PRC1    | protein regulator of cytokinesis 1                   | 2.860           |          | Nucleus   | other                      |
| PTTG1   | pituitary tumor-transforming 1                       | 2.211           | Down     | Nucleus   | transcription<br>regulator |
| WEE1    | WEE1 G2 checkpoint kinase                            | 204.071         | Down     | Nucleus   | kinase                     |

**Supplementary Table S7: Primers used for the Sanger Sequencing of BCOR**

| Primer name  | Sequence 5'-3'          |
|--------------|-------------------------|
| BCOR-E1-F    | ATGCCTCAGTTTCTCACTCTG   |
| BCOR-E1-R    | TAGGAGAACTCAAAACAACCTCG |
| BCOR-E2-F    | AGCGCGGGAGCTGCTGAG      |
| BCOR-E2-R    | GCGCGAGGCAAAAAGCTTCG    |
| BCOR-E3-F    | GACCACTGTAGACAGCAGG     |
| BCOR-E3-R    | ATCAAGAGCGGCCTACTAGG    |
| BCOR-E4-F    | GGGCCATTGACAGCTGGTG     |
| BCOR-E4-R    | CAGCCCTGCTCTGAACTGC     |
| BCOR-E5-F1   | TGTGCTTGGATGTTAAGGCTG   |
| BCOR-E5-R1   | GGACCGACGTAGTGAGGTG     |
| BCOR-E5-F2   | ATTCCTGAACATGTACAAGGC   |
| BCOR-E5-R2   | AGCCCTGCTGTGAACCAGG     |
| BCOR-E5-F3   | CTCCTCTGTTGGAGAAGCAG    |
| BCOR-E5-R3   | CTGGGTGAGGGTAGACAGG     |
| BCOR-E5-F4   | TCTCCAAATGAGGCATTCAGG   |
| BCOR-E5-R4   | AAGTTACAGCAGGGCCATCG    |
| BCOR-E5-F5   | CCCTGCAGCAGCACCGTG      |
| BCOR-E5-R5   | GCATCCAGACACGCCTCAG     |
| BCOR-E6-F    | GAGTATGTATTAACTTGCTAGTG |
| BCOR-E6-R    | CAATGAATAAAGACGACCATGG  |
| BCOR-E7-F    | AGTTACATCTCATAAGCTGTGG  |
| BCOR-E7-R    | CACAGACGCCTCGTTCCTG     |
| BCOR-E8-F    | TTGTGCTAACCATGTGTGAGG   |
| BCOR-E8-R    | CGAGGCAGTGTGGGAATGG     |
| BCOR-E9-10-F | AGATGGCCAAAGATGATTAGG   |
| BCOR-E9-10-R | CTGAGGCTGGAATGAAGGTG    |
| BCOR-E11-F   | GCCGCTCCAGTGATCAGTG     |
| BCOR-E11-R   | GACATGCTCCTCTAGGACAG    |
| BCOR-E12-F   | AATAAAGTGCCTCTCTCCACG   |
| BCOR-E12-R   | AGAGACAGCAGTGAGAGTGG    |
| BCOR-E13-F   | TCAGGCGCTTCGCACATGTG    |
| BCOR-E13-R   | TCAGAAGCTTTGGTTCACAGG   |
| BCOR-E14-F   | AGTTTCCCTATCTGTGCAGTG   |
| BCOR-E14-R   | CTTTACAGTTTCAGCCTTTGTG  |
| BCOR-E15-F   | GGAAATGACCTTCAGCCTG     |
| BCOR-E15-R   | ACTACAGCAAGATGTCCACAG   |
| BCOR-E16-F   | TTTCTGTCTGGTATGGGTGAG   |
| BCOR-E16-R   | AAATATCTACTGCATTGTGTGAG |
| BCOR-E17-F   | GATCAGAGAGTAGGTATGGTG   |
| BCOR-E17-R   | TCTAAGTCCTTCTGACTGGAG   |

**Supplementary Table S8: Primers used for the Sanger sequencing of SMO**

---

|         |                                                  |
|---------|--------------------------------------------------|
| Exon1   | GAGGTCGTGCGTGTGGC<br>GCCTGAGCCTGTTCTTTCC         |
| Exon2   | GGAGGACAGGGGTGAAGC<br>CCTGCCCTATAACCCGGTC        |
| Exon3   | TCCCTAAACAAGAGGCTCG<br>CTTCCCTCTGGCTCTCTCC       |
| Exon4   | GGTCTGGGGCTCAGTTAAGG<br>GGTAAACGCACACTTCAGCC     |
| Exon5-6 | GGGAGACCAGGTAGAGGGAG<br>CTGGGGTTTCAGCATGGG       |
| Exon7   | ACTACCCATCCTTCCCAG<br>AGGAGGGTGCAGTGTTGG         |
| Exon 8  | GAGGTGGGTGTCTTTATGGC<br>GACTCTCTCCTCCCCACTGC     |
| Exon 9  | GGTGACAGAGCAAGATCCTATCTC<br>GTCCCAAGGCTGAGGGTG   |
| Exon10  | TCCCAAGATTTGATGGGAAG<br>CCAAATAATCTGTGTGCCCC     |
| Exon11  | CAGGGACCGGGAAGTCAC<br>ACAGCCCCTGTACTCCAGTC       |
| Exon12  | ACAGGTTAAGTGCTCCCAGG<br>GAAGAAGAGCCTTGAAGGTATTGG |

---



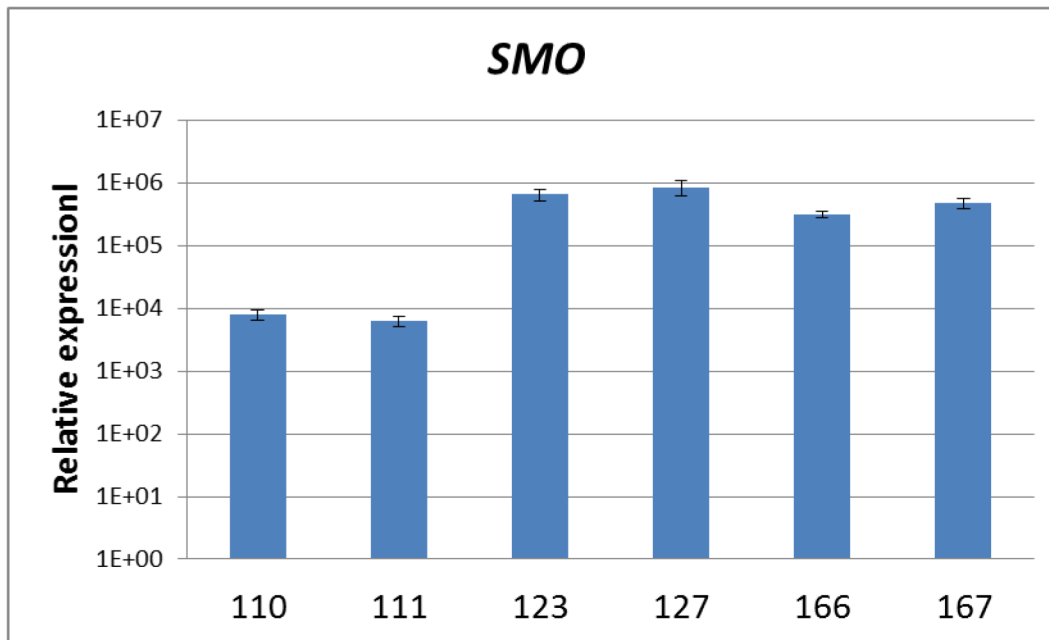

**Supplementary Figure S1: The expression of *SMO* was analyzed by qRT-PCR in two normal brain tissues (110 and 111), in two regions of the primary tumor (123 and 127) and in two inoculation metastases (166 and 167). After normalization to the housekeeping gene *HPRT1*, the relative quantification value was expressed as  $2^{-\Delta\Delta C_t}$ . Expression analysis was done in triplicates.**

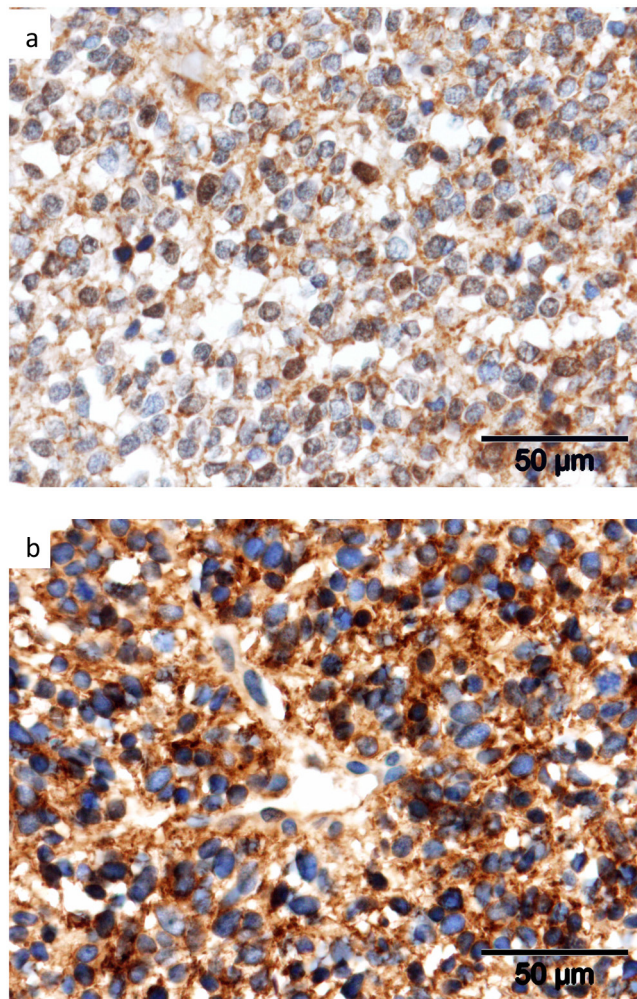

**Supplementary Figure S2:** The primary tumor a. and a metastasis b. were stained in parallel with a beta-catenin specific antibody.

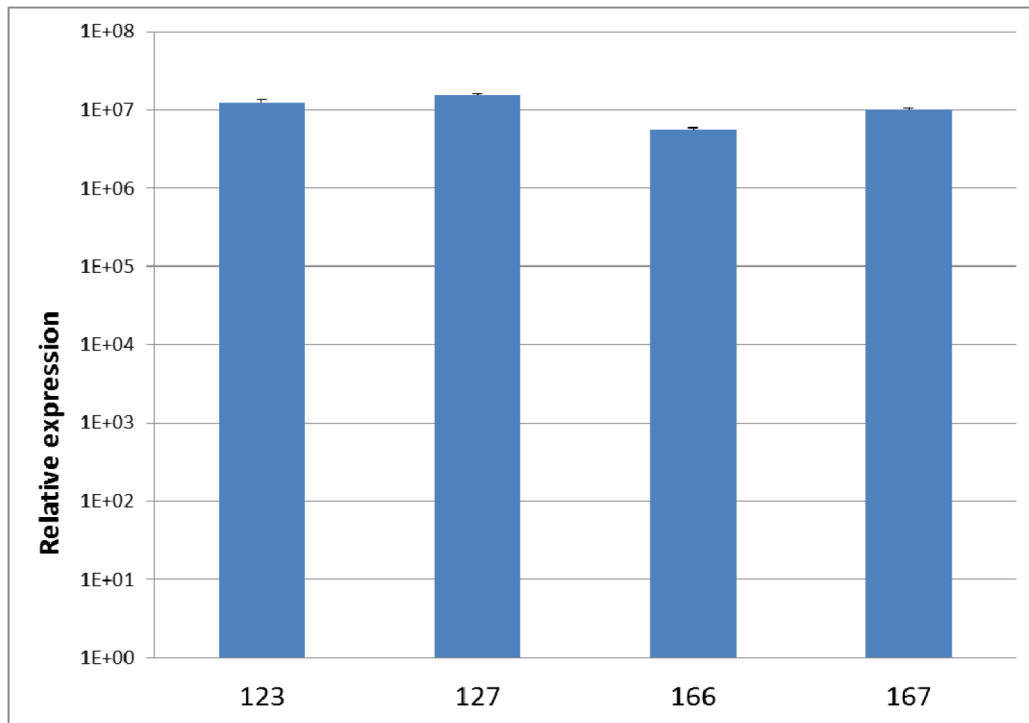

**Supplementary Figure S3: The expression of LEF1 was analyzed by qRT-PCR in two regions of the primary tumor (123, 127) and in two inoculation metastases (166 and 167).** After normalization to the housekeeping gene *HPRT1*, the relative quantification value was expressed as  $2^{-\Delta\Delta C_t}$ . Expression analysis was done in triplicates.
